# Supplementary material for: Trace fluorine substituted calcium deficient hydroxyapatite with excellent osteoblastic activity and antibacterial ability
Source: Royal Society of Chemistry journal article supplement (doi:10.1039/c8ce01325j), 2018-01-01
Supplement: c8ce01325j1.pdf [file c8ce01325j1.pdf]

## Electronic Supplementary Information

### Trace fluorine substituted calcium deficient hydroxyapatite with excellent osteoblastic activity and antibacterial ability

Liping Wang<sup>a,b</sup>, Ming Wang<sup>a</sup>, Miao Li<sup>a</sup>, Zhiyong Shen<sup>a</sup>, Wang Yunli<sup>a</sup>, Shao Yiran<sup>a</sup>,  
Yingchun Zhu<sup>a,\*</sup>

<sup>a</sup> Key Laboratory of Inorganic Coating Materials CAS, Shanghai Institute of Ceramics, Chinese Academy of Sciences, Shanghai 200050, China

<sup>b</sup> University of Chinese Academy of Sciences, Beijing 100049, China

\* Corresponding author. Tel.: +86 02152412632; Fax: +86 02152412632; E-mail: yzhu@mail.sic.ac.cn.

**Table. S1** The lattice constants, crystal size, and strain of the FHA powders were calculated by XRD refinement method using Jade 5.0 software, considering the strongest three peaks (211), (112), and (300)

| Samples | Lattice constants |           | Size(Å) | Strain(%) |
|---------|-------------------|-----------|---------|-----------|
|         | a-axis(Å)         | c-axis(Å) |         |           |
| HA      | 9.4187            | 6.8844    | 276     | 0.5292    |
| F0.002  | 9.4185            | 6.8841    | 275     | 0.5240    |
| F0.02   | 9.4174            | 6.8847    | 273     | 0.5180    |
| F0.2    | 9.4108            | 6.8850    | 264     | 0.4816    |

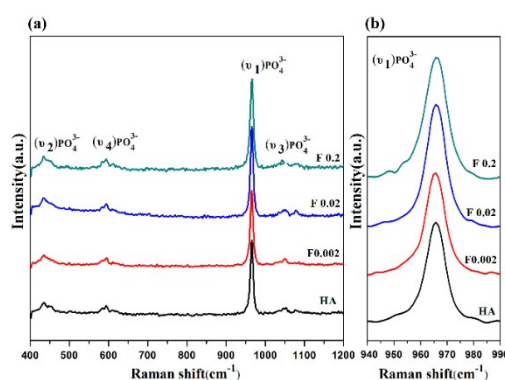

**Fig. S1** (a) Raman spectra for obtained FHA powders with different fluorine contents; (b) the  $\nu_1$  mode of the  $\text{PO}_4^{3-}$  became sharper with the increase of the F contents.

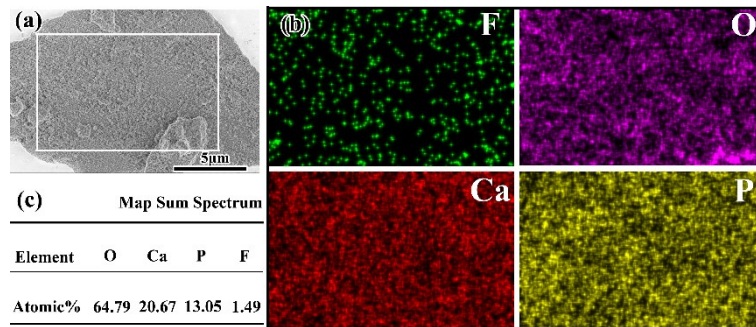

**Fig. S2** (a) FESEM image of the selected zone and its (b) element mapping and (c) elemental composition on sample F0.2. The atomic ratio of Ca/P was 1.58.

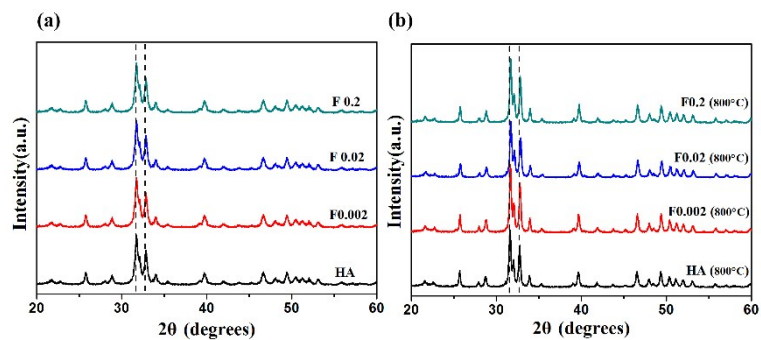

**Fig. S3** XRD spectra of the FHA pellets (a) before and (b) after calcination at 800 for 2 h. The FHA samples showed well-crystallized phases before calcination and their crystallinity increased after calcination at 800°C for 2 h.

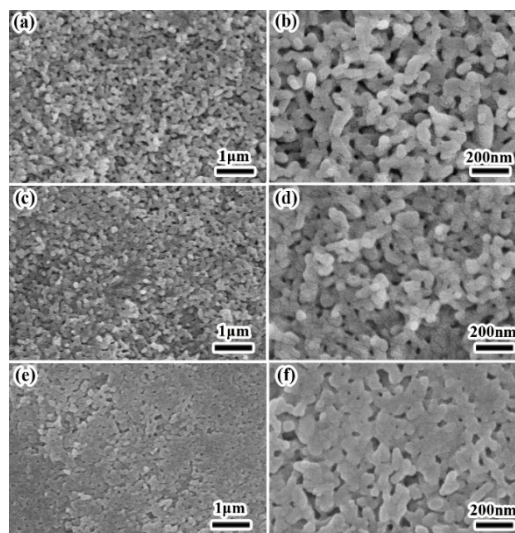

**Fig. S4** SEM images of the surface morphology for FHA pellets: (a-b) HA, (c-d) F0.02, (e-f) F0.2.

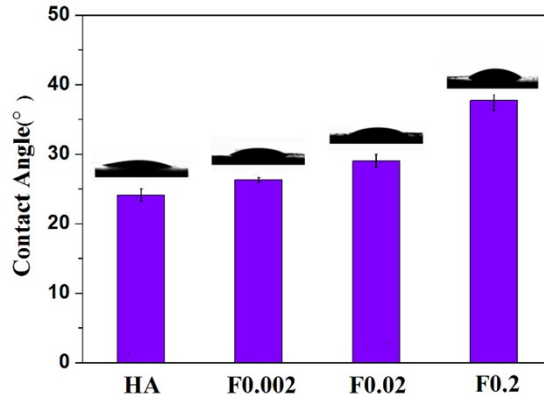

**Fig. S5** Water contact angles of FHA pellets. With the increase of F content in the specimens, the contact angle increased from 24.1° to 37.7°. The contact angle of F0.02 were not significantly different from HA.

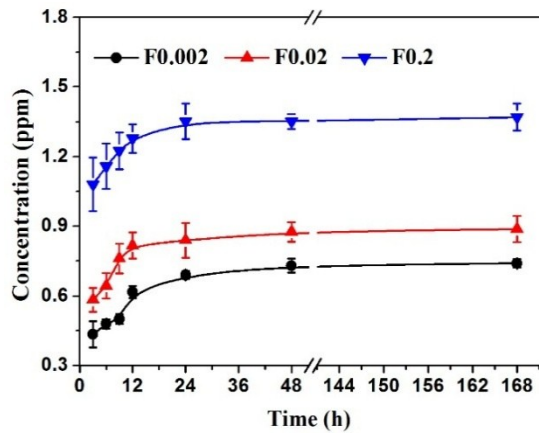

**Fig. S6** The F release profile of the FHA pellets in PBS.

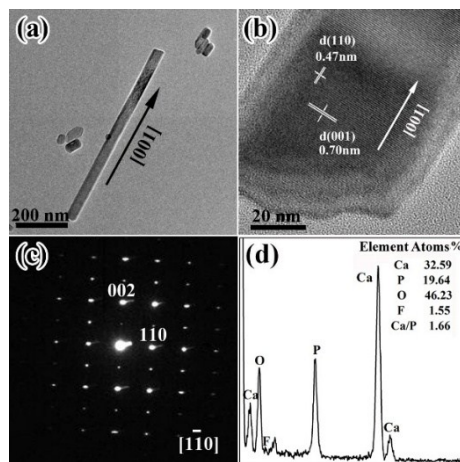

**Fig. S7** TEM analysis of sample F2: (a) TEM image; (b) HRTEM image; (c) SEAD pattern and (d) EDS spectra. TEM images showed that F2 exhibited rod-like nanoparticles, and the Ca/P molar ratio of F2 was about 1.66.
